1 Title: Auditory Brainstem Mechanisms Likely Compensate for Self-imposed Peripheral  
2 Inhibition

3  
4 Abbreviated title: Brainstem Compensation of Peripheral Inhibition

5  
6 **Authors** Abigayle Peterson<sup>1,2</sup>, Vijayalakshmi Easwar<sup>1,3</sup>, Lindsey Powell<sup>1</sup>, and Sriram  
7 Boothalingam<sup>1,2</sup>

8  
9 <sup>1</sup>*Waisman Center and Department of Communication Sciences & Disorders*  
10 *University of Wisconsin-Madison, Madison, WI 53705*

11 <sup>2</sup>*Macquarie University, Sydney, Australia*

12 <sup>3</sup>*National Acoustic Laboratories, Sydney, Australia*

13  
14  
15 **Corresponding Author:**

16 Sriram Boothalingam<sup>1+</sup>

17 [sriram.boothalingam@mq.edu.au](mailto:sriram.boothalingam@mq.edu.au)

18  
19  
20  
21  
22  
23  
24  
25  
26 **Conflict of interest statement**

27 The authors report no competing financial interests.

28  
29  
30  
31 **Acknowledgments**

32 This work was supported by the Office of the Vice Chancellor for Research and Graduate  
33 Education, University of Wisconsin-Madison. Portions of this work were presented at the 2019  
34 American Auditory Society Meeting, Scottsdale, AZ.

35  
36  
37  
38  
39  
40  
41  
42  
43  
44  
45

46  
47  
48  
49  
50  
51  
52  
53  
54  
55  
56  
57  
58  
59  
60  
61  
62  
63  
64  
65  
66  
67  
68

## **Abstract**

It is well known that the medial olivocochlear reflex (MOCR) in the brainstem, part of the efferent network, inhibits the cochlear active gain mechanism. The upstream neural influence of this peripheral inhibition is less understood. When the MOCR is activated, responses generated in the cochlea and cortex undergo putative attenuation, yet the amplitude of responses generated in the brainstem are perplexingly unaffected despite decreased input from the periphery. Based on known neural circuitry, we hypothesized that the inhibition of peripheral input is compensated for by equivalent positive feedback in the brainstem over time. We predicted that the inhibition can be captured at the brainstem with stimuli shorter (1.5 s) than previously employed long durations (4 min) where this inhibition is diminished due to compensation. Results from 18 normal hearing human listeners support our hypothesis in that when the MOCR is activated, there is a robust reduction of responses generated at the periphery, brainstem, and cortex for short stimuli and that brainstem inhibition diminishes for longer stimuli. Our methodology and findings have implications for auditory disorders such as tinnitus, evaluation of efferent function, and provides a novel non-invasive window into potential gain compensation mechanisms in the brainstem.

69

## **Introduction**

70           Efferent neural networks fine-tune and regulate afferent sensory inputs. One such  
71 network at the level of the brainstem, the medial olivocochlear reflex (MOCR), modulates  
72 activity of one of the most peripheral auditory structures, the cochlear outer hair cells (OHCs).  
73 The OHCs actively amplify basilar membrane motion for low-level sounds. When activated, the  
74 MOCR inhibits this amplification process, thus turning down the cochlear gain. This reduction in  
75 cochlear activity is thought to be useful for signal detection in noise (Winslow and Sachs, 1987;  
76 Warren & Liberman, 1989) and protection against loud sounds (Rajan, 1988; Liberman, 1990;  
77 Lauer and May, 2011). While the peripheral consequences of this inhibition are well-understood  
78 from studies using measures such as otoacoustic emissions (OAEs) and auditory nerve  
79 compound action potentials (CAPs), the upstream neural influence remains unknown, especially  
80 in humans. As such, the goal of this study was to determine the central consequences of  
81 peripheral MOCR inhibition. Our motivation stems from the need to uncover the ecological  
82 relevance of MOCR inhibition. This requires an improved understanding of its effect along the  
83 auditory pathway at different timescales.

84

85           It is well-established that stimulus-driven peripheral responses such as CAPs and OAEs  
86 undergo robust attenuation when the MOCR is activated (Galambos, 1956; Warren & Liberman,  
87 1989; Siegel and Kim, 1982; review: Guinan, 2006). However, current evidence perplexingly  
88 exhibits a disparity of MOCR influence in the central systems based on the location of response  
89 generation along the auditory neuraxis. For instance, endogenous components of cortical  
90 responses (e.g., auditory steady state responses [ASSR] elicited at 40 Hz and thalamocortical  
91 loop resonance in the gamma band), undergo considerable attenuation in the presence of putative

92 MOCR activation (Özdamar & Bohórquez, 2008; Ross et al., 2005, 2012; Maki et al., 2009).  
93 However, sensory-driven neural responses that originate in the brainstem (e.g., ASSR elicited at  
94 80 Hz and auditory brainstem response [ABR] wave V), appear unaffected under same testing  
95 conditions (Özdamar & Bohórquez, 2008; Maki et al., 2009). This brainstem immunity to  
96 MOCR effects, typically elicited by contralateral noise, remains unexplained. Here, we seek to  
97 clarify our hypothesis that brainstem-dominant neural responses show immunity because local  
98 feedback networks in the brainstem compensate for the peripheral inhibition.

99

100         The rationale for our hypothesis is rooted in (1) previously identified circuits that are  
101 capable of such compensation (Fujino & Oertel, 2001; Hockley et al., 2021), and (2) gain  
102 compensation that occurs for more extreme peripheral input loss due to pathologies such as  
103 cochlear ablation, deafferentation, and conductive loss (Chambers et al., 2016; Parry et al., 2019;  
104 Sheppard et al., 2019). We predict that if local feedback networks do compensate for the MOCR-  
105 mediated peripheral inhibition, a latency between stimulus presentation, peripheral inhibition,  
106 and complete compensation would be apparent. Based on the time (~400 ms) it takes for the  
107 MOCR inhibition on OHCs to stabilize (Boothalingam et al., 2021; Backus and Guinan, 2006),  
108 we speculated that the time taken for complete compensation will fall between 0.5 and a few  
109 seconds. To test this prediction, we concurrently measured peripheral (cochlear) and neural  
110 (brainstem or cortical) responses in short (1.5 s) and long (4 mins) click-trains. Our results  
111 support our hypothesis in that, responses at the periphery (OAEs at 40 and 80 Hz), brainstem (80  
112 Hz ASSRs) and the cortex (40 Hz ASSRs) demonstrate robust inhibition in shorter durations,  
113 however, for longer durations, only the inhibition of brainstem responses diminishes. That is, the  
114 inhibition appears to be compensated for at the brainstem between 1.5 s and 4 mins. This

115 approach likely provides a window into brainstem feedback circuits that are involved in  
116 enhancing the peaks of complex signals (e.g., speech) and possibly maintaining the homeostasis  
117 in response to a, self-imposed, decrease in auditory input from the periphery (Brown, 2011;  
118 Fujino & Oertel, 2001; Hockley et al., 2021). In addition, our non-invasive, approach offers a  
119 solution to evaluating auditory efferent function in patients with sensorineural hearing loss and  
120 offers a new perspective on the ecological relevance of the MOCR.

121

## 122 **Materials and Methods**

### 123 **Participants**

124 Twenty young, clinically normal-hearing adults participated in the study. Clinically  
125 normal hearing was established by an unremarkable otoscopic examination, bilateral hearing  
126 thresholds  $\leq 20$  dB HL at octave frequencies from 0.25 to 8 kHz (SmartAuD, Intelligent Hearing  
127 Systems [IHS], FL, USA), normal middle ear function as measured by tympanometry (Titan,  
128 Interacoustics, Denmark), measurable (magnitude greater than 0 dB with at least 6 dB signal-to-  
129 noise ratio [SNR]) distortion product OAEs (0.5-6 kHz at 65/55 dB SPL, SmartDPOAE, IHS,  
130 FL), and self-report of no neurological disorders. Two participants were rejected from analysis  
131 due to excessive noise in OAEs, reducing the number of participants to 18 (mean age  $\pm$  standard  
132 deviation [SD]) =  $22.3 \pm 3$  years; 1 male). Participants were either offered extra credit for their  
133 participation or compensated at the rate of \$10/hour. The study procedures were approved by the  
134 University of Wisconsin-Madison Health Sciences Institutional Review Board. Written consent  
135 was obtained from all participants prior to data collection.

136

### 137 **Stimuli**

138 All stimuli were digitally generated in MATLAB (v2017b; Mathworks, MA, USA) at a  
139 sampling rate of 96 kHz and a bit-depth of 24. The stimuli used to elicit OAEs and ASSRs were  
140 click trains with click rates of either 40 or 80 Hz presented at 65 dB peak-to-peak (pp) SPL.  
141 Whereas the 40 Hz clicks elicit a predominantly cortical response, the 80 Hz clicks elicit a  
142 predominantly brainstem response (Bidelman, 2018; Herdman et al., 2002; Kuwada et al., 2002;  
143 review: Dimitrijevic and Ross, 2008). Although henceforth we will refer to 40 Hz vs. 80 Hz  
144 responses as synonymous with cortical vs. brainstem sources for brevity given previously  
145 established dominant neural sources, it is acknowledged that both scalp-recorded responses  
146 reflect multiple neural generators. The clicks were bandlimited between 0.8 and 5 kHz to focus  
147 the stimulus energy on frequency regions where the MOCR function is most prominent, when  
148 measured using OAEs (Lilaonitkul and Guinan, 2012; Zhao and Dhar, 2012). Bandlimited clicks  
149 were generated in the frequency domain using a recursive exponential filter (Zweig and Shera,  
150 1995; Charaziak et al., 2020) and inverse Fourier-transformed to the time domain. The duration  
151 of the click was  $\sim 108 \mu\text{s}$ . Clicks were presented in positive and negative polarities to reduce  
152 potential contamination with stimulus artifact when averaging for ASSRs. Broadband noise  
153 (0.001 to 10 kHz) was presented at 60 dB SPL in the contralateral ear to elicit the MOCR. Both  
154 the ipsilateral clicks and the contralateral noise are illustrated in Fig. 1. In-ear calibration was  
155 performed for clicks to ensure the peak-to-peak level of the click stimulus was 65 dB ppSPL in  
156 all participants. Broadband noise was calibrated in an ear simulator (Type 4157, Bruel & Kjaer,  
157 Denmark).

158

159 **Instrumentation**

160 Stimuli were generated, delivered and controlled through an iMac computer (Apple, CA,  
161 USA) running Auditory Research Lab Audio Software (ARLas v4.2017; Goodman, 2017) on  
162 MATLAB. The iMac was interfaced with an external sound card (Fireface UFX+; RME,  
163 Germany) via thunderbolt for analog-to-digital-to-analog conversion at a sampling rate of 96  
164 kHz. Clicks were presented in the ipsilateral ear via one of the miniature loudspeakers of the  
165 ER10C+ (Etymotic Research, IL, USA) system. Ear canal pressures were registered and  
166 amplified (+20 dB) by the ER10C+ probe microphone placed in each ear. To avoid changes in  
167 stimulus level over the course of the experiment, the probe placement was secured in the ear  
168 using foam tips and using silicone putty around the probe in-ear (Silicast, Westone Laboratories,  
169 CO; Boothalingam and Goodman, 2021). The MOCR eliciting broadband noise was presented in  
170 the contralateral ear using an ER2 (Etymotic Research, IL) insert earphone coupled with a foam  
171 tip of appropriate size.

172

173 Electroencephalography (EEG) amplitude was registered by the Universal Smart Box  
174 (USB; IHS, FL, USA) controlled by a PC equipped with the Continuous Acquisition Module  
175 (IHS, FL, USA) at the sampling rate of 10016 Hz. One of the IHS USB channels recorded  
176 triggers (5V impulses) that coincided with the onset of stimulus blocks to index EEG data  
177 accurately. A single-channel montage was used for EEG acquisition with three sintered Ag-AgCl  
178 electrodes. The vertex (Cz) was used as the non-inverting electrode site and the nape was used as  
179 the inverting site (Picton et al., 2003). The left collarbone was used as the ground. All electrode  
180 sites were cleaned with alcohol wipes and scrubbed with a mild abrasive gel (Nuprep) prior to  
181 affixing electrodes with adhesive sleeves and conduction gel (SignaGel). Electrode impedances  
182 were monitored throughout the experiment and were always  $<3 \text{ k}\Omega$  at each site.

183

## 184 **Experimental Design**

185           The experiment was conducted in a double-walled sound-attenuating booth where  
186 participants sat comfortably in a recliner for the duration of the experiment. Participants were  
187 instructed to sit relaxed, not move, swallow as few times as comfortable during stimulation, and  
188 maintain a wakeful state (watching a silent, closed caption movie). As shown in Fig. 1, OAEs  
189 and ASSRs were measured at 40 and 80 Hz with and without contralateral noise, in short (1.5 s)  
190 and long (4 min) durations. The conditions (rate and duration) alternated between clicks with and  
191 without contralateral noise separated by 0.5 s of silence, and was repeated in positive and  
192 negative polarities. The long condition was a single block of 4 min recording completed  
193 separately for with- and without-contralateral noise, i.e., no repetitions. In contrast, in the short  
194 condition, 1.5 s-long click trains were repeated 160 times to match the total number of clicks  
195 presented in the respective long condition. This was done to avoid SNR differences in responses  
196 between long and short conditions analyzed in the frequency domain. The order of presentation  
197 in short/long conditions was counter-balanced but the 40 Hz short duration was always  
198 completed first to ensure maximum wakeful participant state as 40 Hz can be attenuated by sleep  
199 (Picton et al., 2003). The stimulus ear was chosen based on the ear with the largest DPOAE  
200 amplitude obtained during screening. The experimental procedure took about two hours with  
201 breaks, as desired by the participant, between conditions.

202

## 203 **Response Analysis**

204           OAEs were extracted from click ‘epochs’, defined as the duration between two  
205 successive clicks. OAE analysis was performed offline in MATLAB using custom scripts. Raw



206 ear canal pressure recording was bandpass filtered around the click frequency (0.8–5 kHz). An  
207 artifact rejection, where clicks with a root-mean-square (RMS) amplitude that fell outside the  
208 third quantile + 2.25 times the interquartile range (specific to the condition and within  
209 participants) were excluded from further analysis. Typically, less than 10% of the responses were  
210 rejected across participants. Data was grouped by duration with or without contralateral noise.  
211 The stimulus (0–4ms) and OAEs (6.5–12.5ms) were then separated for further analysis for both  
212 40 and 80 Hz rates. Specifically, OAEs were used to determine the presence of the MOCR. The  
213 click stimulus was used to determine the presence of the middle ear muscle reflex (MEMR) that  
214 can potentially confound MOCR effects on OAEs (Boothalingam et al., 2018).

215

216 OAE amplitude was estimated as the RMS of ear canal pressure between 6.5–12.5 ms  
217 and the noise floor was estimated by the mean difference of two OAE RMS buffers (even and  
218 odd-numbered epochs). Prior to estimating the RMS amplitude, OAEs were considered in the  
219 frequency domain to extract OAEs 12 dB above the noise floor to ensure the MOCR-mediated  
220 inhibition was estimated only from high quality OAEs (Guinan, 2012; Goodman et al., 2012;  
221 Boothalingam et al., 2021). For each duration and rate condition, the RMS of OAE and stimulus  
222 amplitude (dB SPL) with noise were subtracted from the RMS without noise to compute the  
223 effect of MOCR and MEMR (in dB), respectively.

224

225 The same pre-processing strategy as ear canal pressure was applied to the raw EEG data.  
226 Raw EEGs were chunked into 1.5-s or 4-min epochs corresponding to short and long durations,  
227 respectively. Chunked EEGs were averaged over opposite stimulus polarities to minimize any  
228 stimulus artifacts. Finally, ASSR amplitudes were determined from the Fourier transforms of the

229 averaged EEGs across with and without noise estimates at 40 and 80 Hz. EEG noise floor was  
230 estimated as the average of 8 frequency bins around the ASSR frequencies (Picton et al., 2003).  
231 The reduction in response amplitude with contralateral noise relative to no-noise condition is  
232 henceforth referred to as ‘inhibition’ in both OAEs and ASSRs.

233

### 234 **Middle ear muscle reflex (MEMR) estimation**

235 When elicited by high level sound, the MEMR stiffens the ossicular chain, altering signal  
236 transfer through the middle ear (Boothalingam et al., 2021; Borg, 1968) and may thus confound  
237 MOCR effects on OAEs (Boothalingam et al., 2021; Goodman et al., 2013; Guinan et al., 2003).  
238 The click stimulus (0–4 ms) in the same frequency range as the OAEs was analyzed to determine  
239 the presence of MEMR. The same analyses as OAEs were applied to obtain stimulus level across  
240 conditions. To evaluate if the MEMR influenced OAEs, we performed two tests. First, a 3-way  
241 repeated measures analysis of variance (RM-ANOVA) was performed to test if the MEMR  
242 magnitude varied as a function of independent variables duration, click rate, and contralateral  
243 noise. Our results show that none of the main effects and interactions were significant ( $p>0.05$ ).  
244 This suggests that the variables in the study did not systematically influence the stimulus level,  
245 therefore, even if any MEMR was activated, it did not influence our results. Second, Pearson  
246 correlations were performed to evaluate the relation between any change in stimulus amplitude  
247 on OAEs. As seen in Fig. 2, none of the correlations, except the long condition at 80 Hz, were  
248 significant suggesting that the changes in stimulus level did not influence changes in OAE level.  
249 For the significant correlation at long/80 Hz, removing the one outlier made the correlation non-  
250 significant (Fig. 2., panel C). Clearly, for this one participant, MEMR likely influenced the OAE

251 change in this one condition. However, we did not exclude this data for further analysis below  
252 because (1) this is not consistent across conditions, (2) the influence is on the direction opposite  
253 to what is expected – increase in OAE level as opposed to a reduction, and (3) because group  
254 effects were not significant (3-way ANOVA). Taken together, the OAE changes presented in this  
255 study are driven by the MOCR and not the MEMR.

## 256 Results

257 ASSR and OAE amplitudes are plotted as a function of click rate (40 vs. 80 Hz),  
258 contralateral noise (with vs. without), and duration (long vs. short) in Fig. 3. Notice the marked  
259 reduction in both OAE and ASSR amplitudes in the long condition. This reduction appears  
260 relatively unchanged for OAEs between short and long conditions. A 3-way repeated measures  
261 analysis of variance (ANOVA) for ASSRs revealed a significant three-way interaction. That is,  
262 the effect of noise varied as a function of duration and rate ( $F[1, 17]=33.28, p<0.001$ ). Post-hoc  
263 *t*-tests were corrected for multiple comparisons using the False Discovery Rate (FDR; Benjamini  
264 and Hochberg, 1995). We report FDR corrected *p*-values and hence  $p<0.05$  are to be interpreted  
265 as significant. These post-hoc tests demonstrate a significant effect of noise on 40 Hz ASSR in  
266 both short ( $p<0.001$ ) and long ( $p=0.03$ ) durations, however, the effect of noise on 80 Hz ASSR  
267 was only significant for the short ( $p<0.001$ ) but not long ( $p=0.486$ ) duration.

268 A 3-way repeated measures ANOVA on OAE amplitude showed no significant 3-way  
269 interaction but the two-way interaction between duration and click rate ( $F[1, 17]= 13.2,$   
270  $p=0.002$ ) and the two-way interaction between duration and noise ( $F[1, 17]=8.81, p=0.008$ )  
271 were significant. Further, OAE amplitude also varied as a main effect of noise ( $F[1, 17] = 58.5,$   
272  $p<0.001$ ) suggesting and peripheral inhibition through MOCR activation, as expected. Post-hoc

273 *t*-tests suggest the effect of noise on OAE amplitude was significant for both short ( $p < 0.001$ ) and  
274 long ( $p < 0.001$ ) durations when averaged over both rates.

275 To investigate the influence of MOCR inhibition at the periphery (OAEs) on the  
276 inhibition at brainstem (80 Hz ASSR) and cortical (40 Hz ASSR) levels, we performed  
277 correlations. These relations are plotted in Fig. 4. ASSR and OAE inhibition were not correlated  
278 for the 40 Hz short condition ( $p = 0.454$ ), the 40 Hz long condition ( $p = 0.962$ ), and the 80 Hz long  
279 condition ( $p = 0.981$ ). However, the change in OAEs and ASSRs was positively correlated in the  
280 80 Hz short duration condition ( $p = 0.045$ ). Although the *p*-value is only marginally significant for  
281 this correlation, the coefficient ( $r = 0.48$ ) is consistent with a moderate-to-large effect (Cohen,  
282 1988) and the trend in the data (Fig. 4) is quite apparent unlike the other non-significant  
283 correlations. This result likely suggests that changes observed in ASSRs generated  
284 predominantly at the cortex (40 Hz) are likely not influenced by MOCR-induced OAE changes  
285 at the periphery. However, for ASSRs generated predominantly at the brainstem (80 Hz), the  
286 changes at the periphery likely influence neural activity when viewed in shorter time intervals,  
287 but this washes out when observed over a longer time window.

288 The relation between the short and long durations for ASSRs and OAEs in the magnitude  
289 of inhibition are shown in Fig. 5. There was a significant positive correlation between OAE  
290 inhibition in short and long durations observed for both 40 Hz ( $p < 0.001$ ) and 80 Hz ( $p = 0.001$ )  
291 rates. This indicates that individuals exhibited similar OAE inhibition magnitudes in long and  
292 short durations, likely due to a single mechanism, the MOCR, influencing activity at the  
293 periphery. However, this relationship was not observed for the ASSR inhibition between short

294 and long for 40 Hz ( $p=0.770$ ) or 80 Hz ( $p=0.346$ ), suggesting differential effects of the eliciting  
295 contralateral noise depending on the duration of stimulus presentation.

296 We also compared inhibition between the two click rates within short and long durations  
297 and separately for ASSRs and OAEs to investigate if any relationships exist between rates. That  
298 is to test if responses generated at various levels of the auditory pathway are related in the  
299 manner they are measured in this study. The comparisons and correlations are plotted in Fig. 6.  
300 For ASSRs, there was no correlation between the inhibition at both click rates for ASSR short  
301 ( $p=0.299$ ) and long ( $p=0.434$ ) durations, as expected. This likely indicates that amplitude  
302 changes observed in cortical-dominated (40 Hz) ASSRs are independent of brainstem-dominated  
303 (80 Hz) ASSR changes in both time durations. For OAEs, while there was a significant  
304 correlation between 40 and 80 Hz in the short condition ( $p=0.020$ ), the correlation in the long  
305 condition was not significant ( $p=0.961$ ), consistent with the interaction between rate and  
306 duration in the ANOVA for OAEs. Taken together, these results align with our hypothesis that  
307 brainstem mechanisms likely compensate for self-imposed peripheral inhibition.

308

309

## **Discussion**

310 By monitoring cochlear, brainstem and cortical activity with and without MOCR  
311 activation in short and long stimulus durations (1.5 s and 4 mins), we found (1) significant  
312 inhibition at the periphery and cortex, but not at the brainstem, with long duration stimuli,  
313 consistent with previous studies (Özdamar & Bohórquez, 2008; Kawase et al., 2012; Maki et al.,  
314 2009; Ross et al., 2005, 2012; Usubuchi et al., 2014), and (2) significant inhibition at the  
315 periphery, cortex and notably the brainstem, with short duration stimuli. Below, we discuss these

316 results based on known gain compensation circuits at the brainstem reported in animal models  
317 (Hockley et al., 2021; Fujino and Oertel, 2001) and potential alternative reasons.

318

### 319 **Gain compensation in the brainstem**

320 In contrast to the 40 Hz ASSR, the 80 Hz ASSR demonstrates differential inhibition  
321 based on the stimulus duration. Methodologically, the total duration of stimulus presentation was  
322 equalized between the long and short duration conditions and therefore does not warrant the  
323 observed differential effect. In addition, at the periphery, the MOCR inhibition of OAEs across  
324 rates and durations is indistinguishable. Given the lack of methodological differences and  
325 similarity in peripheral MOCR inhibition between the two durations, the differential effect of  
326 noise on the 80 Hz, but not 40 Hz ASSR, can be conjectured to arise either (1) from the  
327 difference in the sensitivity of the respective generators to contralateral noise or (2) second-  
328 degree factors that influence the generated ASSR differentially between brainstem and more  
329 rostral centers.

330

331 Previous studies have demonstrated generator-specific effects of contralateral noise.  
332 Notably, Özdamar & Bohórquez (2008) showed robust attenuation of later occurring components  
333 (Pb) of the middle latency responses elicited at 40 Hz, presumably generated in the cortex.  
334 However, such an effect was not observed for concurrently measured ABR wave-V, generated in  
335 the brainstem. Similarly, Galambos and Makeig (1992) reported significant attenuation of click-  
336 evoked 40 Hz ASSR but not concurrently recorded ABRs. Maki et al. (2009), like the present  
337 study compared attenuation of 40 and 80 Hz ASSRs to contralateral noise. They reported  
338 reduction of 40 Hz ASSRs but no effect of the contralateral noise on 80 Hz ASSRs. Speculations

339 for such disparity in noise effects on responses generated at the brainstem vs. the cortex has been  
340 attributed to one of two reasons. It is possible that noise effects must occur more rostral to the  
341 ABR generation site (brainstem; Galambos and Makeig, 1992; Usubuchi et al., 2014), i.e., the  
342 generators themselves must be different or that any peripheral inhibition by the MOCR is  
343 insignificant for neural measures (Özdamar & Bohórquez, 2008).

344

345         The speculation that noise-mediated inhibition of neural responses, also referred to as  
346 central masking, occurring only rostral to the brainstem (Galambos and Makeig, 1992; Usubuchi  
347 et al., 2014) does not explain the differential noise effects for different types of cortical  
348 responses. For instance, although Usubuchi et al. (2014) found significant inhibition for both 20  
349 and 40 Hz neuromagnetic ASSRs, the effect of contralateral noise was more pronounced for the  
350 40 Hz response. While comparing the neuromagnetic 40 Hz ASSRs and the sensory-driven N100  
351 response, Kawase et al. (2012) found robust inhibition of 40 Hz with contralateral noise but no  
352 effect on the N100. However, Okamoto et al. (2005) was demonstrated inhibition of the same  
353 neuromagnetic N100 like many EEG estimates of N100 (e.g., Salo et al., 2003; Rao et al., 2020).  
354 A notable difference between Okamoto et al. (2005) and Kawase et al. (2012) is that Okamoto et  
355 al. (2005), apart from studying notch width effects of the noise, use a paradigm that is more akin  
356 to our short interval condition where the effect of noise was captured on the test stimulus within  
357 0.5s. In general, there appears to be variable effects of contralateral noise even within responses  
358 generated in the cortex and thalamocortical regions. This suggests that other second-degree  
359 factors, likely both stimuli-based (e.g., stimulus duration) and physiology-based (e.g., phase reset  
360 hypothesis on 40 Hz generation; Ross et al., 2005), are at play in the contralateral noise-mediated  
361 inhibitory effects on cortical activity. These factors might also apply for the differences in noise

362 effects observed between cortex- vs. brainstem-generated ASSRs in the present study simply by  
363 virtue of the two generators being different. The different generator, however, does not support  
364 contralateral noise sensitivity to structures only rostral to the brainstem.

365

366 The argument for OHC inhibition by the MOCR being insignificant for neural inhibition  
367 (Özdamar & Bohórquez, 2008) also does not explain the disparity in noise effects across neural  
368 response generators because (1) the present study results show significant attenuation of 80 Hz  
369 ASSRs when acquired in short time intervals and (2) attenuation of auditory nerve compound  
370 action potentials is an established marker of MOCR activity on the afferent auditory pathway  
371 (Galambos, 1956; Guinan and Gifford, 1988; Liberman, 1989). As such, MOCR-mediated  
372 inhibition of OHC amplifier gain is indeed reflected in the auditory nerve response. Therefore, it  
373 is still perplexing that the MOCR-mediated attenuation is absent for responses generated at the  
374 brainstem when averaged over minutes, especially when it is present (1) at areas rostral to the  
375 brainstem, and (2) when responses at the brainstem are considered in shorter time intervals.

376

377 Our results may, for the first time, provide a reasoning for the perplexing “insignificant”  
378 effect of the MOCR on brainstem generated evoked potentials. Consistent with our hypothesis,  
379 we posit that the MOCR-mediated peripheral inhibition probably does become insignificant at  
380 the brainstem because mechanisms in the brainstem compensate for the loss in input at the  
381 periphery. Known feedback circuitry in the cochlear nucleus support our hypothesis. Based on  
382 positive feedback loops between the cochlear nucleus and the superior olivary complex identified  
383 in previous animal studies, the likely candidates for such compensation would be the T-stellate  
384 (Fujino & Oertel, 2001; Brown, 2011) and the small cells (Hockley et al., 2021).



385

386 Anatomically, both T-stellate and small cells of the CN receive direct inputs from the  
387 auditory nerve (Lieberman, 1991; Blackburn and Sachs, 1989), project to MOC neurons (Romero  
388 and Trussell, 2021; de Venecia, et al., 2005; Benson and Brown, 2006; Thompson and  
389 Thompson, 1991; Darrow et al., 2011), and receive collaterals from MOC neurons (Benson and  
390 Brown, 1990; 1992; Benson et al., 1995; Fujino and Oertel, 2001). These projections and inputs  
391 create positive feedback loops for both cell types (i.e., T-stellate-MOC-T-stellate and small cell-  
392 MOC-small cell). However, Hockley et al. (2021) reported that activating MOC neurons  
393 increased excitation of small cells, but not T-stellate cells. This is intriguing given prior evidence  
394 for profuse amounts of MOC collaterals to multipolar/chopper/T-stellate cells (Fujino & Oertel,  
395 2001; Benson and Brown, 1990; review: Brown, 2011). Hockley et al. (2021) do not report how  
396 activities of the two CN cell types vary across time scales (e.g., seconds to minutes). Regardless,  
397 it is clear that MOC neurons retroactively excite CN neurons, quite likely the same neurons that  
398 excite them. In addition, both the MOC neurons and T-stellate cells project to the inferior  
399 colliculus (IC) (Schofield, 2001; Okoyama et al., 2006), and a recent study suggests that inputs  
400 from CN and IC together optimize MOC activity (Romero and Trussell, 2021). The projection to  
401 the IC is important because it is a major generation site for 80 Hz ASSRs (Bidelman, 2018;  
402 Herdman et al., 2002; Kuwada et al., 2002; review: Dimitrijevic and Ross, 2008) and is in the  
403 vicinity of the ABR wave-V generator (Moller and Jannetta, 1982).

404

#### 405 **Relevance of gain compensation at the brainstem**

406 The putative positive MOCR feedback loops for both cell types, the T-stellate and small  
407 cells, are thought to act as ‘efferent copies’ of MOCR inhibition at the periphery and likely

408 compensate for the reduced input (Brown, 2011; Fujino and Oertel, 2001). This gain  
409 compensation could be critical for at least three reasons. First, a reduction of input at the  
410 periphery will decrease excitation of the MOCR and the MEMR, which will in turn limit their  
411 functional ability to protect vulnerable cochlear hair cells from acoustic overexposure (Rajan,  
412 1988; Liberman, 1990; Lauer and May, 2011; Brown, 2011; Fujino and Oertel, 2001). Second, a  
413 reduction of input at the periphery might negatively impact central gain, and possibly the tuning  
414 of the T-stellate cells (Rhode and Greenberg, 1994) as it would alter the input to D-stellate cells.  
415 By providing inhibitory input to the T-stellate cells, the D-stellates provide a balance in gain in  
416 the CN among their various other functions (Ferragamo et al., 1998; Oertel et al., 2011; Rhode  
417 and Greenberg, 1994). Reduced T-stellate cell inhibition, combined with the recently discovered  
418 excitatory loop gain within T-stellate cells (Cao et al., 2019) could lead to tinnitus and  
419 hyperacusis when left unchecked (Hockley et al., 2021). Third, compensating for reduced  
420 peripheral input likely restores, and possibly enhances, the fidelity of the sound level,  
421 specifically the spectral peaks as encoded by T-stellate cells (Blackburn and Sachs, 1990; May et  
422 al., 1998; Oertel et al., 2011) and small cells (Hockley et al., 2021). At a population level, both  
423 T-stellate cells and small cells encode spectral peaks and have been identified to be critical for  
424 speech perception (Hockley et al., 2021; Oertel et al., 2011; May, LePrell, and Sachs, 1998;  
425 Blackburn and Sachs, 1990). The MOC neurons only provide cholinergic input to the T-stellate,  
426 not D-stellate cell, which is thought to lead to selective enhancement of spectral peaks and not  
427 valleys, improving the overall SNR in the system (Fujino and Oertel, 2001). Further, T-stellate  
428 and small cells respond optimally at moderate to high stimulus levels, like the elicitor used in the  
429 present study (60 dB SPL; Lai, Winslow, and Sachs, 1994; Liberman, 1991; Ryugo, 2008) and  
430 are, therefore, likely to be reflected in our experimental approach.

431

432           Taken together, the compensation mechanisms likely reflected in our results are critical  
433 for maintaining homeostasis, continued protection of peripheral structures, and prevent  
434 peripheral inhibition from degrading the encoding of important acoustic information. By  
435 contrasting short vs. long duration conditions, our results provide a potential non-invasive  
436 window into these mechanisms. As with any non-invasive markers, their true physiological  
437 origins must be established using direct and likely invasive studies of these systems. Specifically,  
438 future studies capable for selectively silencing the feedback from the T-stellate and small cells in  
439 the CN to the MOCR may provide the most conclusive evidence for our hypothesized gain  
440 compensation mechanism.

441

442 **If the brainstem compensates, why is inhibition still present at the brainstem and the**  
443 **cortex?**

444           If the inhibition of peripheral input is compensated for in the CN, the inhibition of  
445 brainstem-generated (80 Hz) ASSRs observed in the short duration condition reveals a time  
446 course to this compensation. Currently, there are no studies that directly describe the  
447 physiological time course of T-stellate/small cell-MOCR-mediated gain compensation.  
448 Nevertheless, the pattern of results in this study may be explained by the established kinetics of  
449 the MOCR pathway. It can be conjectured that inhibition of auditory nerve inputs by the MOCR  
450 causes an initial reduction in inputs to the CN, likely on a scale of several tens to a few hundred  
451 milliseconds, commensurate with the MOCR activation time course of 200-250 ms and the  
452 roughly 400 ms it to reach steady state (Backus and Guinan, 2006; Boothalingam et al., 2021).  
453 Considering that both the MOCR and T-stellate cells integrate energy over time and continue to

454 be excited even after stimulus cessation, the gain compensation could happen over a few  
455 seconds. This initial reduction in peripheral input is reflected as reduced brainstem-dominated  
456 ASSR amplitude (80 Hz) in the short duration condition and is somewhat supported by the  
457 positive correlation with MOCR inhibition of OAEs in this condition (Fig 4D).

458

459         When contralateral noise was introduced, a reduction in cortex-generated (40 Hz) ASSR  
460 amplitude was observed with both long stimulus durations consistent with previous studies  
461 (Galambos & Makeig, 1992; Ross & Fujioka, 2016; Maki et al., 2014; Usubuchi et al., 2009), as  
462 well as with short stimulus durations. However, the lack of significant correlation between the  
463 change in ASSR amplitude for 40 Hz and OAEs (Fig 4) suggest that the reduction in 40 Hz  
464 ASSR amplitude is unlikely to be related to the MOCR-mediated peripheral inhibition. This  
465 finding corroborates the findings of Mertes and Leek (2016) and Mertes and Potocki (2022) –  
466 significant reduction in 40 Hz ASSR without any correlation with the inhibition of OAEs. The  
467 reduction of 40 Hz ASSR amplitude may instead be explained by an interruption in  
468 thalamocortical loop resonance induced by contralateral noise. Desynchronization of 40 Hz  
469 ASSR, associated with a temporary decrease in the amplitude of oscillatory signal power in  
470 response to a concurrent stimulus, was similarly observed by Ross and colleagues (2005; 2012).  
471 ASSR desynchronization is a general reaction to both new and changing stimuli (Ross et al.,  
472 2005) thought to act as a reset to the adaptation of auditory processing (Rogers & Bregman,  
473 1998). The reduction in 40 Hz ASSR amplitude may reflect this temporary desynchronization,  
474 which is more evident when averaging amplitude over short compared to long durations.

475

476 **Clinical implications of a non-invasive window into brainstem gain compensation**

477           Considering the role that peripheral input to the CN plays in the gain compensation  
478 mechanism, the impact of hearing loss should be further investigated for diagnostic/therapeutic  
479 implications and for uncovering the mechanism's ecological purpose. For instance, in the case of  
480 sensorineural hearing loss resulting from outer hair cell damage, MOCR inhibition would not  
481 affect the outer hair cell activity, but the gain compensation may still enhance T-stellate and  
482 small cell excitation. This process may result in a net positive excitation – overcompensation – in  
483 the CN. This overcompensation may contribute to auditory disorders characterized by  
484 hyperactivity such as tinnitus and hyperacusis (Noreña, 2011; Zeng, 2013; Cao et al., 2019;  
485 Hockley et al., 2021).

486           MOCR function is important to consider in a clinical setting as it has been hypothesized  
487 to improve speech perception in noise (Giraud et. al., 1997; Kumar and Vanaja, 2004; Mishra  
488 and Lutman, 2014). Prior arguments for an MOCR role in speech perception were based only on  
489 its ability to restore the dynamic range of the auditory nerve (Guinan, 2006). Evidence of MOCR  
490 collateral activity in CN – enhancing T-stellate and small cell output – further strengthens the  
491 role of MOCR in speech perception (Fujino and Oertel, 2001; Hockley et al., 2021). OAEs are  
492 typically used to measure the MOCR strength in normal hearing individuals. Given that OAEs  
493 rely on OHC activity, hearing loss due to OHC damage emphasizes the need for alternative  
494 measures of MOCR function. While ASSRs appear to be a promising alternative, our findings  
495 indicate that the time scale and generation site at which inhibitory effects are compensated for  
496 must be carefully considered. For instance, the contralateral noise-mediated inhibition of 40 Hz  
497 ASSRs (Mertes and Leek, 2016; Mertes and Potocki, 2022; Usubuchi et al., 2014; Maki et al.,

498 2009) may not reflect MOCR inhibition of OHC activity (Fig 4) as any reduction in peripheral  
499 input to the cortex is likely iteratively compensated for at the brainstem.

500

501 In summary, our findings offer a potential new window into a gain compensation  
502 mechanism in the brainstem previously identified in animal models. Additionally, this study  
503 demonstrates the ability of the 80 Hz ASSR to measure MOCR function using short duration  
504 stimuli. Our methods and corresponding results also emphasize the importance of timescale  
505 consideration for future research utilizing ASSRs to measure the MOCR.

506

### **References**

507 Backus, B. C., & Guinan Jr, J. J. (2006). Time-course of the human medial olivocochlear reflex.

508 *The Journal of the Acoustical Society of America*, 119(5), 2889-2904.

509 Benson, T. E., & Brown, M. C. (1990). Synapses formed by olivocochlear axon branches in the

510 mouse cochlear nucleus. *Journal of Comparative Neurology*, 295(1), 52-70.

511 Benson, T. E., & Brown, M. C. (2006). Ultrastructure of synaptic input to medial olivocochlear

512 neurons. *Journal of Comparative Neurology*, 499(2), 244-257.

513 Bidelman, G. M., Jennings, S. G., Lopez-Poveda, E. A., Smith, S. B., Lichtenhan, J. T., & Cone,

514 B. K. (2017). Contralateral Inhibition of Click- and Chirp-Evoked Human Compound

515 Action Potentials. *Frontiers in Neuroscience*, 11, 189.

516 <https://doi.org/10.3389/fnins.2017.00189>

517 Bidelman, G. M. (2018). Subcortical sources dominate the neuroelectric auditory frequency-

518 following response to speech. *Neuroimage*, 175, 56-69.

- 519 Blackburn, C. C., & Sachs, M. B. (1990). The representations of the steady-state vowel  
520 sound/e/in the discharge patterns of cat anteroventral cochlear nucleus neurons. *Journal of*  
521 *neurophysiology*, 63(5), 1191-1212.
- 522 Özdamar, O. & Bohórquez, J. (2008) Suppression of the Pb (P1) component of the auditory  
523 middle latency response with contralateral masking. *Clinical Neurophysiology* **119**, 1870–  
524 1880.
- 525 Boothalingam, S., Kurke, J., & Dhar, S. (2018). Click-evoked auditory efferent activity: Rate and  
526 level effects. *Journal of the Association for Research in Otolaryngology*, 19(4), 421-434.  
527
- 528 Boothalingam, S., Goodman, S. S., MacCrae, H., & Dhar, S. (2021). A Time-Course-Based  
529 Estimation of the Human Medial Olivocochlear Reflex Function Using Clicks. *Frontiers in*  
530 *Neuroscience*, 15.
- 531 Borg, E. (1968). A quantitative study of the effect of the acoustic stapedius reflex on sound  
532 transmission through the middle ear of man. *Acta oto-laryngologica*, 66(1-6), 461-472.
- 533 Brown, M. C. (2011). Anatomy of olivocochlear neurons. In *Auditory and vestibular efferents*  
534 (*pp. 17-37*). Eds. D. K. Ryugo, R. R. Fay, and A. N. Popper. Springer, New York, NY.
- 535 Cao, X. J., Lin, L., Sugden, A. U., Connors, B. W., & Oertel, D. (2019). Nitric oxide-mediated  
536 plasticity of interconnections between t-stellate cells of the ventral cochlear nucleus  
537 generate positive feedback and constitute a central gain control in the auditory system.  
538 *Journal of Neuroscience*, 39(31), 6095-6107.
- 539 Chambers, A. R., Resnik, J., Yuan, Y., Whitton, J. P., Edge, A. S., Liberman, M. C., & Polley,  
540 D. B. (2016). Central Gain Restores Auditory Processing following Near-Complete  
541 Cochlear Denervation. *Neuron*, 89(4), 867–879.  
542 <https://doi.org/10.1016/J.NEURON.2015.12.041>

- 543 de Boer, J., Thornton, A. R. D., & Krumbholz, K. (2012). What is the role of the medial  
544 olivocochlear system in speech-in-noise processing? *Journal of Neurophysiology*, *107*(5),  
545 1301–1312. <https://doi.org/10.1152/JN.00222.2011>
- 546 De Venecia, R. K., Liberman, M. C., Guinan Jr, J. J., & Brown, M. C. (2005). Medial  
547 olivocochlear reflex interneurons are located in the posteroventral cochlear nucleus: a kainic  
548 acid lesion study in guinea pigs. *Journal of Comparative Neurology*, *487*(4), 345-360.
- 549 Dimitrijevic, A. & Ross, B. (2008). Neural Generators of the Auditory Steady-State. *The*  
550 *Auditory Steady-State Response: Generation, Recording, and Clinical Application*, 83.
- 551 Ferragamo, M. J., Golding, N. L., & Oertel, D. (1998). Synaptic inputs to stellate cells in the  
552 ventral cochlear nucleus. *Journal of neurophysiology*, *79*(1), 51-63.
- 553 Fujino, K., & Oertel, D. (2001). Cholinergic modulation of stellate cells in the mammalian  
554 ventral cochlear nucleus. *Journal of Neuroscience*, *21*(18), 7372-7383.
- 555 Galambos, R. (1956). Suppression of auditory nerve activity by stimulation of efferent fibers to  
556 cochlea. *Journal of Neurophysiology*, *19*(5), 424–437.  
557 <https://doi.org/10.1152/JN.1956.19.5.424>
- 558 Guinan Jr, J. J. (2006). Olivocochlear efferents: anatomy, physiology, function, and the  
559 measurement of efferent effects in humans. *Ear and hearing*, *27*(6), 589-607.
- 560 Herdman, A. T., Lins, O., Van Roon, P., Stapells, D. R., Scherg, M., & Picton, T. W. (2002).  
561 Intracerebral sources of human auditory steady-state responses. *Brain topography*, *15*(2),  
562 69-86.
- 563 Kawase, T., Maki, A., Kanno, A., Nakasato, N., Sato, M., & Kobayashi, T. (2012). Contralateral  
564 white noise attenuates 40-Hz auditory steady-state fields but not N100m in auditory evoked



565 fields. *NeuroImage*, 59(2), 1037–1042.

566 <https://doi.org/10.1016/J.NEUROIMAGE.2011.08.108>

567 Kuwada, S., Anderson, J. S., Batra, R., Fitzpatrick, D. C., Teissier, N., & D'Angelo, W. R.

568 (2002). Sources of the scalp-recorded amplitude-modulation following response. *Journal of*

569 *the American Academy of Audiology*, 13(04), 188-204.

570 Liberman, M.C. (1991). Central projections of auditory-nerve fibers of differing spontaneous

571 rate. I. An- teroventral cochlear nucleus. *The Journal of Comparative Neurology*,

572 313(2):240–258.

573 Liberman, MC and Kiang, NY. (1984). Single-neuron labeling and chronic cochlear pathology.

574 IV. Stereocilia damage and alterations in rate- and phase-level functions. *Hearing Research*,

575 16(1):75–90.

576 Maki, A., Kawase, T., & Kobayashi, T. (2009). Effects of contralateral noise on 40-Hz and 80-

577 Hz auditory steady-state responses. *Ear and Hearing*, 30(5), 584–589.

578 <https://doi.org/10.1097/AUD.0B013E3181ACFB57>

579 May, B. J., Prell, G. S. L., & Sachs, M. B. (1998). Vowel representations in the ventral cochlear

580 nucleus of the cat: effects of level, background noise, and behavioral state. *Journal of*

581 *neurophysiology*, 79(4), 1755-1767.

582 Mulders, W. H., Harvey, A. R., & Robertson, D. (2007). Electrically evoked responses in onset

583 chopper neurons in guinea pig cochlear nucleus. *Journal of neurophysiology*, 97(5), 3288-

584 3297.

585 Oertel, D., Wright, S., Cao, X. J., Ferragamo, M., & Bal, R. (2011). The multiple functions of T

586 stellate/multipolar/chopper cells in the ventral cochlear nucleus. *Hearing research*, 276(1-

587 2), 61-69

- 588 Okoyama, Shigeo, Masao Ohbayashi, Makoto Ito, and Shinichi Harada. "Neuronal organization  
589 of the rat inferior colliculus participating in four major auditory pathways." *Hearing*  
590 *research* 218, no. 1-2 (2006): 72-80.
- 591 Parry, L. v., Maslin, M. R. D., Schaette, R., Moore, D. R., & Munro, K. J. (2019). Increased  
592 auditory cortex neural response amplitude in adults with chronic unilateral conductive  
593 hearing impairment. *Hearing Research*, 372, 10–16.  
594 <https://doi.org/10.1016/J.HEARES.2018.01.016>
- 595 Picton, T. W., John, M. S., Purcell, D. W., & Plourde, G. (2003). Human auditory steady-state  
596 responses: the effects of recording technique and state of arousal. *Anesthesia & Analgesia*,  
597 97(5), 1396-1402.
- 598 Rajan, R. (1988). Effect of Electrical Stimulation of the Crossed Olivocochlear Bundle on  
599 Temporary Threshold Shifts in Auditory Sensitivity. I. Dependence on Electrical  
600 Stimulation Parameters. In *JOURNAL OF NEUROPHYSIOLOGY* (Vol. 60, Issue 2).
- 601 Robertson, D., & Mulders, W. H. (2011). Central effects of efferent activation. In *Auditory and*  
602 *Vestibular Efferents* (pp. 291-312). Eds. D. K. Ryugo, R. R. Fay, and A. N. Popper.  
603 Springer, New York, NY.
- 604 Ross, B., Herdman, A. T., & Pantev, C. (2005). Stimulus induced desynchronization of human  
605 auditory 40-Hz steady-state responses. *Journal of Neurophysiology*, 94(6), 4082–4093.  
606 <https://doi.org/10.1152/JN.00469.2005/ASSET/IMAGES/LARGE/Z9K0120551020007.JPG>  
607 [EG](#)

- 608 Ross, B., Miyazaki, T., & Fujioka, T. (2012). Interference in dichotic listening: the effect of  
609 contralateral noise on oscillatory brain networks. *European Journal of Neuroscience*, 35(1),  
610 106–118. <https://doi.org/10.1111/J.1460-9568.2011.07935.X>
- 611 Schofield, B. R. (2011). Central descending auditory pathways. In *Auditory and vestibular*  
612 *efferents* (pp. 261-290). Eds. D. K. Ryugo, R. R. Fay, and A. N. Popper. Springer, New  
613 York, NY.
- 614 Sheppard, A., Liu, X., Ding, D., & Salvi, R. (2018). Auditory central gain compensates for  
615 changes in cochlear output after prolonged low-level noise exposure. *Neuroscience letters*,  
616 687, 183-188.
- 617 Trussell, L. O. (2002). Cellular mechanisms for information coding in auditory brainstem nuclei.  
618 In *Integrative functions in the mammalian auditory pathway* (pp. 72-98). Eds. Oertel, D., R.  
619 R. Fay, and A. N. Popper. Springer, New York, NY.
- 620 Usubuchi, H., Kawase, T., Kanno, A., Yahata, I., Miyazaki, H., Nakasato, N., Kawashima, R., &  
621 Katori, Y. (2014). Effects of Contralateral Noise on the 20-Hz Auditory Steady State  
622 Response - Magnetoencephalography Study. *PLOS ONE*, 9(6), e99457.  
623 <https://doi.org/10.1371/JOURNAL.PONE.0099457>
- 624 Warren, E. H., & Liberman, M. C. (1989). Effects of contralateral sound on auditory-nerve  
625 responses. I. Contributions of cochlear efferents. *Hearing Research*, 37(2), 89–104.  
626 [https://doi.org/10.1016/0378-5955\(89\)90032-4](https://doi.org/10.1016/0378-5955(89)90032-4)
- 627 Winslow, R. L., & Sachs, M. B. (1987). Effect of electrical stimulation of the crossed  
628 olivocochlear bundle on auditory nerve response to tones in noise. *Journal of*  
629 *neurophysiology*, 57(4), 1002-1021

630

631

### **Figure Captions**

632

633

634

635

636

**Figure 1: Schematic of the experimental protocol.** Both 40 and 80 Hz clicks were

presented in short (1.5 s) and long durations (4 mins) at 65 dB ppSPL, with and without a 60 dB

SPL broadband noise in the contralateral ear. Clicks were presented in positive and negative

polarities to facilitate ASSR averaging. Each stimulus duration was separated by 0.5 s of silence.

637

638

639

640

641

642

643

644

**Figure 2: Stimulus vs. OAE change.** Stimulus amplitude change as a function of OAE

amplitude change for (A) 40 Hz click-rate, long stimulus duration (B) 40 Hz click-rate, short

stimulus duration (C) 80 Hz click-rate, long stimulus duration (D) 80 Hz click-rate, short

stimulus duration. Open circles represent individual participants. A black solid regression line

represents a significant relationship between variables. A black dashed regression line represents

a nonsignificant relationship between variables. The resulting correlation coefficient ( $r$ ) and  $p$ -

value are presented in each panel. In panel C, the blue solid regression line correlation when the

outlier is included.

645

646

647

648

649

650

**Figure 3: Response amplitude change with contralateral noise.** ASSR in the top four

panels and OAEs in the bottom four panels. Columns separate long and short duration conditions

and rows separate 40 and 80 Hz click-rates. Black circles (40 Hz click-rate) and black triangles

(80 Hz click-rate) indicate group means and grey lines represent individual participants. Error

bars represent  $\pm$  one standard deviation. Asterisks denote a significant difference in amplitude

between with- (WiN) and no-noise (NoN) conditions.

651 **Figure 4: ASSRs vs. OAE amplitude change.** (A) 40 Hz click-rate, long stimulus duration  
652 (B) 40 Hz click-rate, short stimulus duration (C) 80 Hz click-rate, long stimulus duration (D) 80  
653 Hz click-rate, short stimulus duration. Open circles represent individual participants. A black  
654 solid fit line represents a significant relationship between variables. A black dashed fit line  
655 represents a nonsignificant relationship between variables.

656 **Figure 5: Long vs. short duration.** Amplitude changes in the long stimulus durations as  
657 a function of amplitude change in the short stimulus durations are plotted for (A) 40 Hz click-  
658 rate, ASSRs (B) 40 Hz click-rate, OAEs (C) 80 Hz click-rate, ASSRs (D) 80 Hz click-rate,  
659 OAEs. Open circles represent individual participants. A black solid regression line indicates a  
660 significant relationship between the two variables. A black dashed regression line indicates a  
661 non-significant relationship between the two variables.

662 **Figure 6: 40 Hz vs. 80 Hz.** Amplitude changes at 80 Hz click-rate as a function of  
663 amplitude change at 40 Hz click-rate for (A) ASSRs, long stimulus duration (B) ASSRs, short  
664 stimulus duration (C) OAEs, long stimulus duration (D) ASSRs, short stimulus duration. Open  
665 circles represent individual participants. A black solid regression line indicates a significant  
666 relationship between the two variables. A black dashed regression line indicates a non-significant  
667 relationship between the two variables.

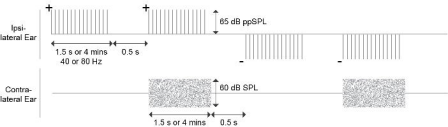

Long

Short

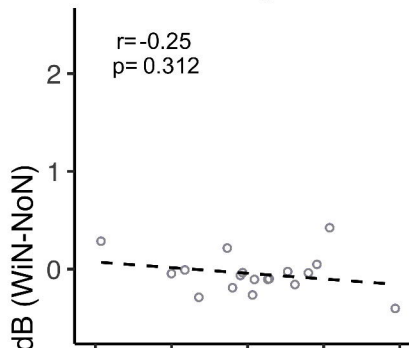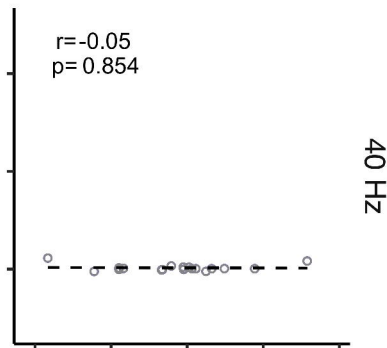

40 Hz

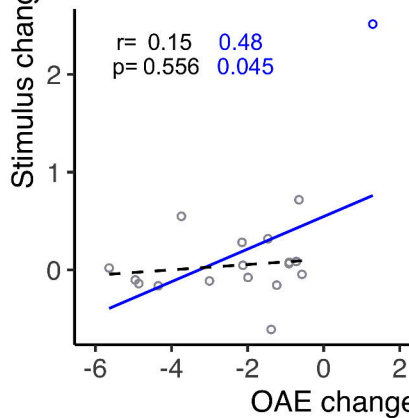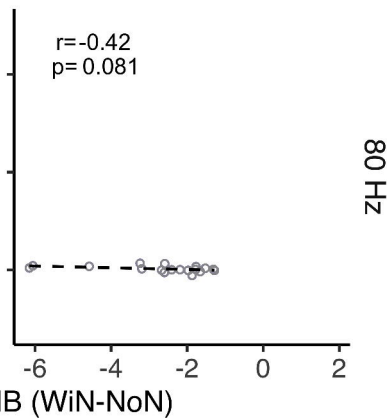

80 Hz

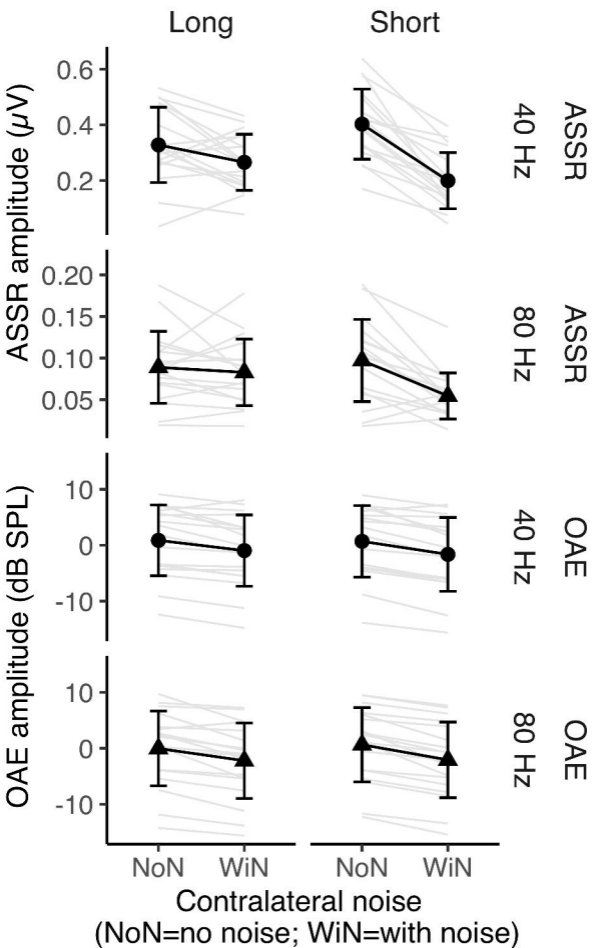



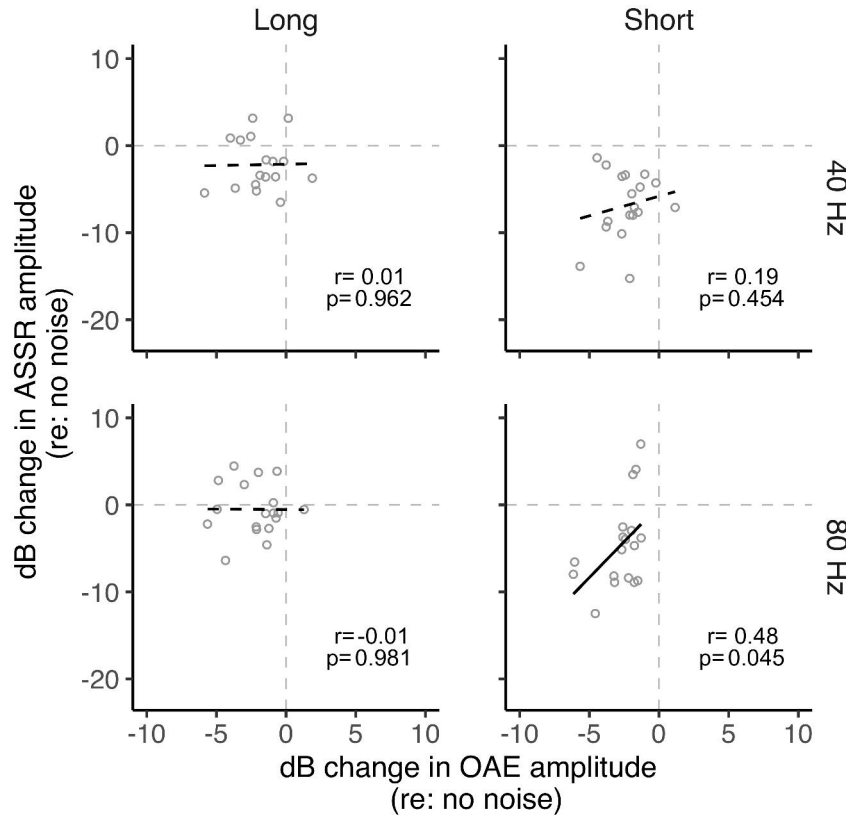

ASSR

OAE

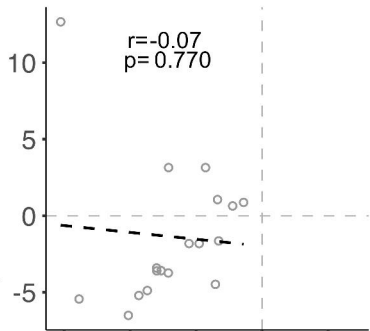 $r = 0.000$   
 $p = 0.990$ 

40 Hz

dB change in Long  
(re: no noise)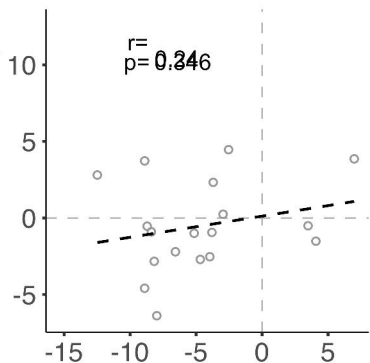 $r = 0.001$   
 $p = 0.999$ 

80 Hz

dB change in Short  
(re: no noise)

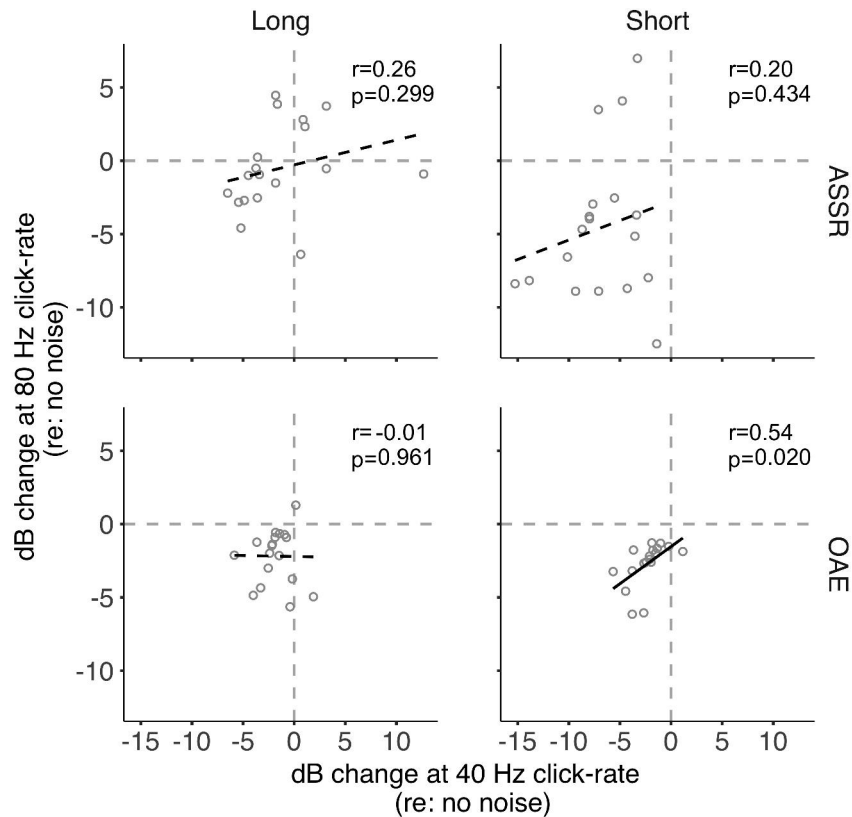

Source: https://www.biorxiv.org/content/10.1101/2022.11.26.518056v1.full.pdf
